# Supplementary material
Source: PubMed Central journal article supplement (PMC2792080)
Supplement: NIHMS108817-supplement-1.pdf [file NIHMS108817-supplement-1.pdf]

| protein ipi                                                             | description                                                                                                                                                                                                                                                                                                                                                                       | peptide sequence          | protein probability | percent coverage | num unique peps | nsp adjusted probability |
|-------------------------------------------------------------------------|-----------------------------------------------------------------------------------------------------------------------------------------------------------------------------------------------------------------------------------------------------------------------------------------------------------------------------------------------------------------------------------|---------------------------|---------------------|------------------|-----------------|--------------------------|
| IPi00113057                                                             | Plasma kallikrein precursor                                                                                                                                                                                                                                                                                                                                                       | ATIPLVPNEECQK             | 1                   | 18.2             | 10              | 0.9908                   |
| IPi00113057                                                             | Plasma kallikrein precursor                                                                                                                                                                                                                                                                                                                                                       | EGEGTQNILQK               | 1                   | 18.2             | 10              | 0.999                    |
| IPi00113057                                                             | Plasma kallikrein precursor                                                                                                                                                                                                                                                                                                                                                       | ESITGTLPR                 | 1                   | 18.2             | 10              | 0.9973                   |
| IPi00113057                                                             | Plasma kallikrein precursor                                                                                                                                                                                                                                                                                                                                                       | GQDLAAYITPDAQYQCK         | 1                   | 18.2             | 10              | 0.9997                   |
| IPi00113057                                                             | Plasma kallikrein precursor                                                                                                                                                                                                                                                                                                                                                       | HSASGTPTSIK               | 1                   | 18.2             | 10              | 0.253                    |
| IPi00113057                                                             | Plasma kallikrein precursor                                                                                                                                                                                                                                                                                                                                                       | ITYGM147IGQSSGYSLR        | 1                   | 18.2             | 10              | 0.0743                   |
| IPi00113057                                                             | Plasma kallikrein precursor                                                                                                                                                                                                                                                                                                                                                       | ITYGMQSSGYSLR             | 1                   | 18.2             | 10              | 0.9997                   |
| IPi00113057                                                             | Plasma kallikrein precursor                                                                                                                                                                                                                                                                                                                                                       | MCTFHPR                   | 1                   | 18.2             | 10              | 0.9996                   |
| IPi00113057                                                             | Plasma kallikrein precursor                                                                                                                                                                                                                                                                                                                                                       | SADNLVSGFSLK              | 1                   | 18.2             | 10              | 0.346                    |
| IPi00113057                                                             | Plasma kallikrein precursor                                                                                                                                                                                                                                                                                                                                                       | TGAISGHSLK                | 1                   | 18.2             | 10              | 0.9996                   |
| IPi00113057                                                             | Plasma kallikrein precursor                                                                                                                                                                                                                                                                                                                                                       | VSEGNVDIALIK              | 1                   | 18.2             | 10              | 0.9997                   |
| IPi00114958,IPi00457636,IPi00656329                                     | Splice Isoform HMW of Kininogen-1 precursor HMW kininogen-I variant,Kng1 protein                                                                                                                                                                                                                                                                                                  | AISTDSPDLEPVLK            | 1                   | 21.7             | 13              | 0.9993                   |
| IPi00114958,IPi00457636,IPi00656329                                     | Splice Isoform HMW of Kininogen-1 precursor HMW kininogen-I variant,Kng1 protein                                                                                                                                                                                                                                                                                                  | COALDM147ITEMAR           | 1                   | 21.7             | 13              | 0.9845                   |
| IPi00114958,IPi00457636,IPi00656329                                     | Splice Isoform HMW of Kininogen-1 precursor HMW kininogen-I variant,Kng1 protein                                                                                                                                                                                                                                                                                                  | COALDMTEI147JAR           | 1                   | 21.7             | 13              | 0.9961                   |
| IPi00114958,IPi00457636,IPi00656329                                     | Splice Isoform HMW of Kininogen-1 precursor HMW kininogen-I variant,Kng1 protein                                                                                                                                                                                                                                                                                                  | COALDMITEMAR              | 1                   | 21.7             | 13              | 0.9997                   |
| IPi00114958,IPi00457636,IPi00656329                                     | Splice Isoform HMW of Kininogen-1 precursor HMW kininogen-I variant,Kng1 protein                                                                                                                                                                                                                                                                                                  | DIPVDSPELK                | 1                   | 21.7             | 13              | 0.9723                   |
| IPi00114958,IPi00457636,IPi00656329                                     | Splice Isoform HMW of Kininogen-1 precursor HMW kininogen-I variant,Kng1 protein                                                                                                                                                                                                                                                                                                  | ENEFFVTQCK                | 1                   | 21.7             | 13              | 0.9976                   |
| IPi00114958,IPi00457636,IPi00656329                                     | Splice Isoform HMW of Kininogen-1 precursor HMW kininogen-I variant,Kng1 protein                                                                                                                                                                                                                                                                                                  | ESNTLAEDECIK              | 1                   | 21.7             | 13              | 0.9997                   |
| IPi00114958,IPi00457636,IPi00656329                                     | Splice Isoform HMW of Kininogen-1 precursor HMW kininogen-I variant,Kng1 protein                                                                                                                                                                                                                                                                                                  | GNLFMDINNK                | 1                   | 21.7             | 13              | 0.9937                   |
| IPi00114958,IPi00457636,IPi00656329                                     | Splice Isoform HMW of Kininogen-1 precursor HMW kininogen-I variant,Kng1 protein                                                                                                                                                                                                                                                                                                  | KATSQVAVGK                | 1                   | 21.7             | 13              | 0.9997                   |
| IPi00114958,IPi00457636,IPi00656329                                     | Splice Isoform HMW of Kininogen-1 precursor HMW kininogen-I variant,Kng1 protein                                                                                                                                                                                                                                                                                                  | LISDFPEATSPK              | 1                   | 21.7             | 13              | 0.9997                   |
| IPi00114958,IPi00457636,IPi00656329                                     | Splice Isoform HMW of Kininogen-1 precursor HMW kininogen-I variant,Kng1 protein                                                                                                                                                                                                                                                                                                  | PVDSPELK                  | 1                   | 21.7             | 13              | 0.8888                   |
| IPi00114958,IPi00457636,IPi00656329                                     | Splice Isoform HMW of Kininogen-1 precursor HMW kininogen-I variant,Kng1 protein                                                                                                                                                                                                                                                                                                  | TDGSPTFY                  | 1                   | 21.7             | 13              | 0.8548                   |
| IPi00114958,IPi00457636,IPi00656329                                     | Splice Isoform HMW of Kininogen-1 precursor HMW kininogen-I variant,Kng1 protein                                                                                                                                                                                                                                                                                                  | TDGSPTFYSEK               | 1                   | 21.7             | 13              | 0.9997                   |
| IPi00131695                                                             | Serum albumin precursor                                                                                                                                                                                                                                                                                                                                                           | CCTLPEDQR                 | 1                   | 6.6              | 3               | 0.0962                   |
| IPi00131695                                                             | Serum albumin precursor                                                                                                                                                                                                                                                                                                                                                           | LVQEVDFAK                 | 1                   | 6.6              | 3               | 0.7623                   |
| IPi00131695                                                             | Serum albumin precursor                                                                                                                                                                                                                                                                                                                                                           | TFVSEHVTK                 | 1                   | 6.6              | 3               | 0.9962                   |
| IPi00131695                                                             | Serum albumin precursor                                                                                                                                                                                                                                                                                                                                                           | YM147CENQATISSK           | 1                   | 6.6              | 3               | 0.9979                   |
| IPi00177214,IPi00407898,IPi00461427,IPi00468055,IPi00625212,IPi00626906 | Igh-6 protein,MGC60843 protein,Igh-6 protein,Igh-6 protein,Ig mu chain C region membrane-bound form,66 kDa protein                                                                                                                                                                                                                                                                | DGFSGPAPR                 | 0.9963              | 1.9              | 1               | 0.9963                   |
| IPi00225699,IPi00606008,IPi00675862                                     | PUTATIVE UNCHARACTERIZED PROTEIN, 0 day neonate thymus cDNA, RIKEN full-length enriched library, clone:A430065P05 product,hypothetical OXIDASE CALCIUM-BINDING TRANSMEMBRANE REDUCTASE TRANSPORT NADPH BURST RESPIRATORY GLYCOPROTEIN OXIDOREDUCTASE, containing protein, full insert sequence,PREDICTED: dual oxidase 2 isoform 2,PREDICTED: similar to dual oxidase 2 isoform 4 | QS1167JFLAQK              | 0.9889              | 3.4              | 1               | 0.9889                   |
| IPi00320239                                                             | Tetraneclin precursor                                                                                                                                                                                                                                                                                                                                                             | AENCAALSGAANGK            | 0.9963              | 6.9              | 1               | 0.9963                   |
| IPi00321666,IPi00473869,IPi00474374,IPi00608044                         | MHC,MHC H-2K antigen,H2-Q10 protein,41 kDa protein                                                                                                                                                                                                                                                                                                                                | FDSDAETPR                 | 0.99                | 4.8              | 1               | 0.99                     |
| IPi00322304                                                             | Histidine-rich glycoprotein HRG                                                                                                                                                                                                                                                                                                                                                   | AQDDCLPSR                 | 1                   | 17.5             | 10              | 0.9997                   |
| IPi00322304                                                             | Histidine-rich glycoprotein HRG                                                                                                                                                                                                                                                                                                                                                   | FESEFPQISK                | 1                   | 17.5             | 10              | 0.9997                   |
| IPi00322304                                                             | Histidine-rich glycoprotein HRG                                                                                                                                                                                                                                                                                                                                                   | FFGYTPPK                  | 1                   | 17.5             | 10              | 0.9997                   |
| IPi00322304                                                             | Histidine-rich glycoprotein HRG                                                                                                                                                                                                                                                                                                                                                   | LGCPPPPPEGK               | 1                   | 17.5             | 10              | 0.9988                   |
| IPi00322304                                                             | Histidine-rich glycoprotein HRG                                                                                                                                                                                                                                                                                                                                                   | LSPTNCDASEPLAEK           | 1                   | 17.5             | 10              | 0.9997                   |
| IPi00322304                                                             | Histidine-rich glycoprotein HRG                                                                                                                                                                                                                                                                                                                                                   | SLOPEIQPFPGTASR           | 1                   | 17.5             | 10              | 0.9997                   |
| IPi00322304                                                             | Histidine-rich glycoprotein HRG                                                                                                                                                                                                                                                                                                                                                   | SPLVFGF                   | 1                   | 17.5             | 10              | 0.9997                   |
| IPi00322304                                                             | Histidine-rich glycoprotein HRG                                                                                                                                                                                                                                                                                                                                                   | TDNGDFASFR                | 1                   | 17.5             | 10              | 0.9997                   |
| IPi00322304                                                             | Histidine-rich glycoprotein HRG                                                                                                                                                                                                                                                                                                                                                   | VSDAHLDR                  | 1                   | 17.5             | 10              | 0.9991                   |
| IPi00322304                                                             | Histidine-rich glycoprotein HRG                                                                                                                                                                                                                                                                                                                                                   | YI243IKI242IT181DNGDFASFR | 1                   | 17.5             | 10              | 0.7917                   |
| IPi00553333,IPi00663327,IPi00664561,IPi00675845                         | Hemoglobin beta-1 subunit,PREDICTED: similar to Hemoglobin beta-1 subunit (Hemoglobin beta-1 chain) (Beta-1-globin) (Hemoglobin beta-major chain) isoform 1,Beta-globin,PREDICTED: similar to Hemoglobin beta-1 subunit (Hemoglobin beta-1 chain) (Beta-1-globin) (Hemoglobin beta-major chain) isoform 2                                                                         | VNSDEVGGEALGR             | 0.9831              | 25               | 1               | 0.9831                   |
