# Supplementary material
Source: PubMed Central journal article supplement (PMC2792080)
Supplement: NIHMS108817-supplement-2.pdf [file NIHMS108817-supplement-2.pdf]

MS/MS data for couple of peptides detected for each proteins  
Identified in these samples

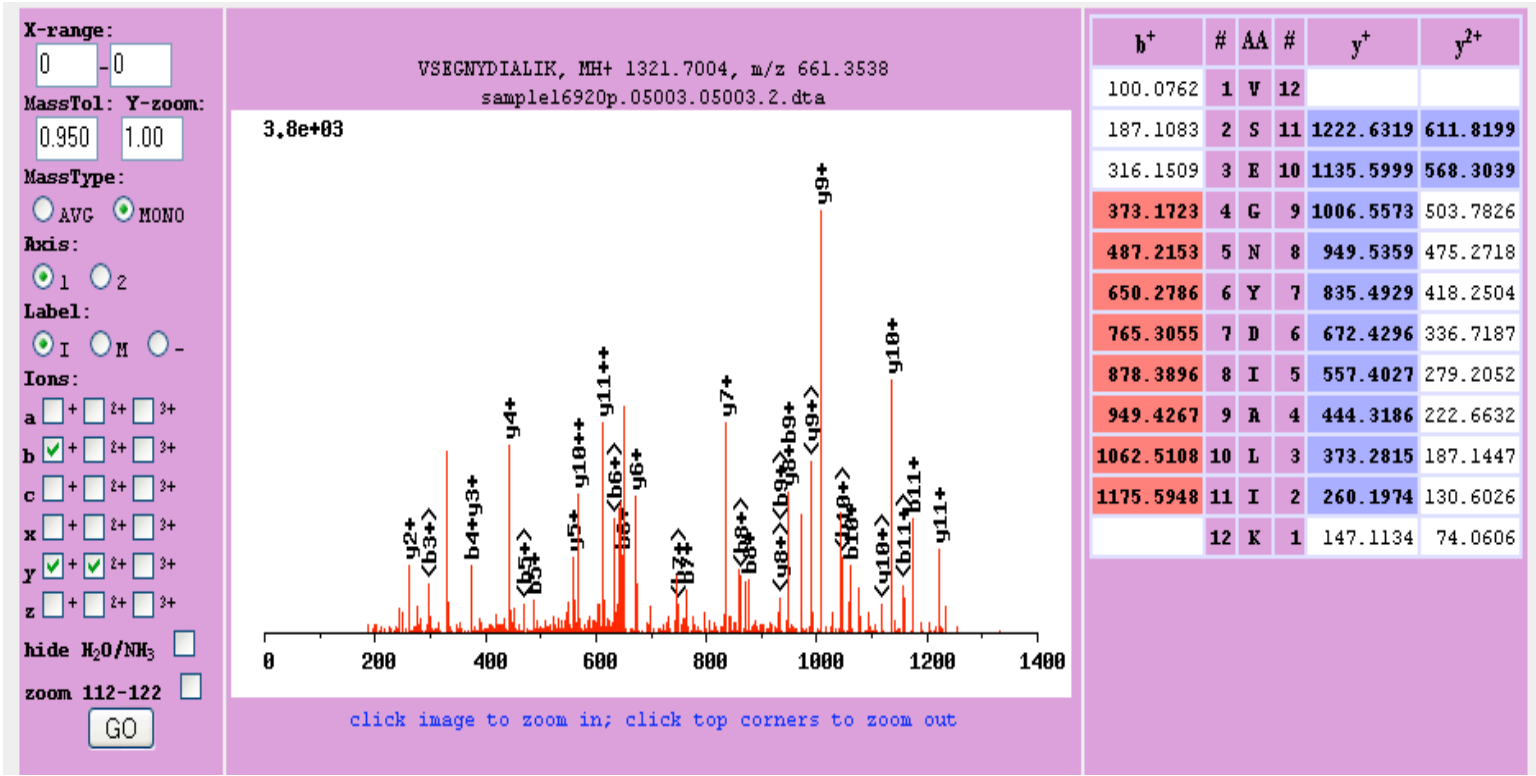

Protein: Plasma kallikrein precursor, Peptide: VSEGNVDIALIK, MH+ 1321.7004, m/z 661.3538, sample16920p.05003.05003.2.dta

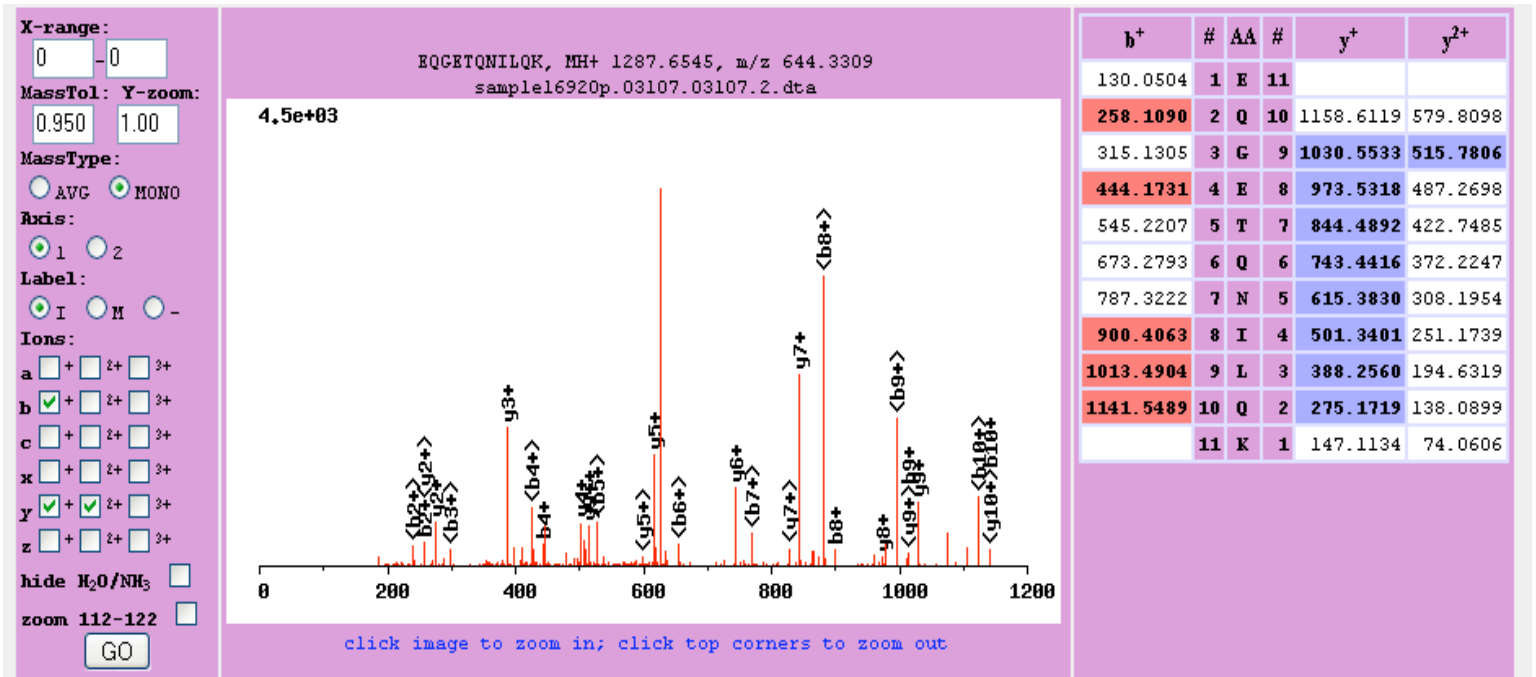

Protein: Plasma kallikrein precursor, Peptide: EQGETQNILQK, MH+ 1287.6545, m/z 644.3309, sample16920p.03107.03107.2.dta

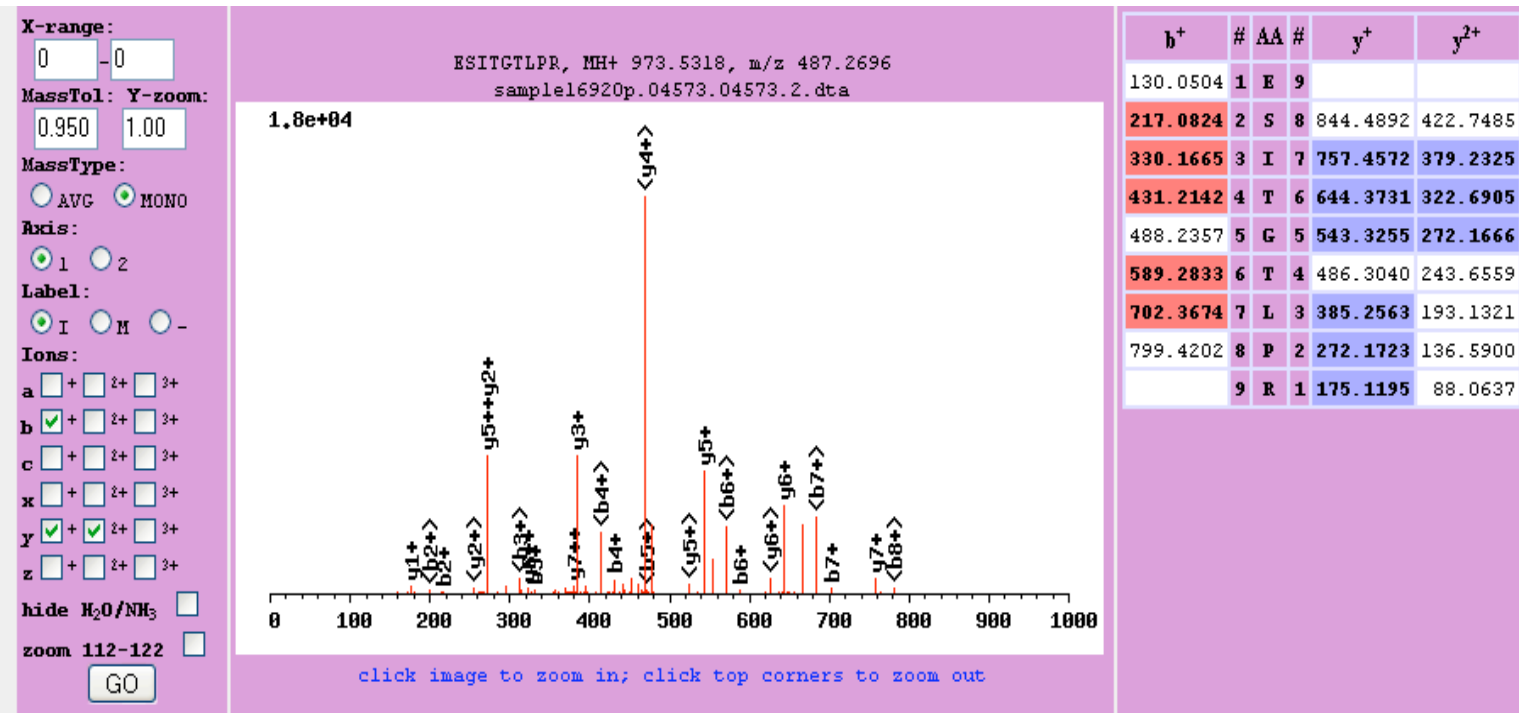

Protein: Plasma kallikrein precursor, Peptide: ESITGTLPR, MH+ 973.5318, m/z 487.2696, sample16920p.04573.04573.2.dta

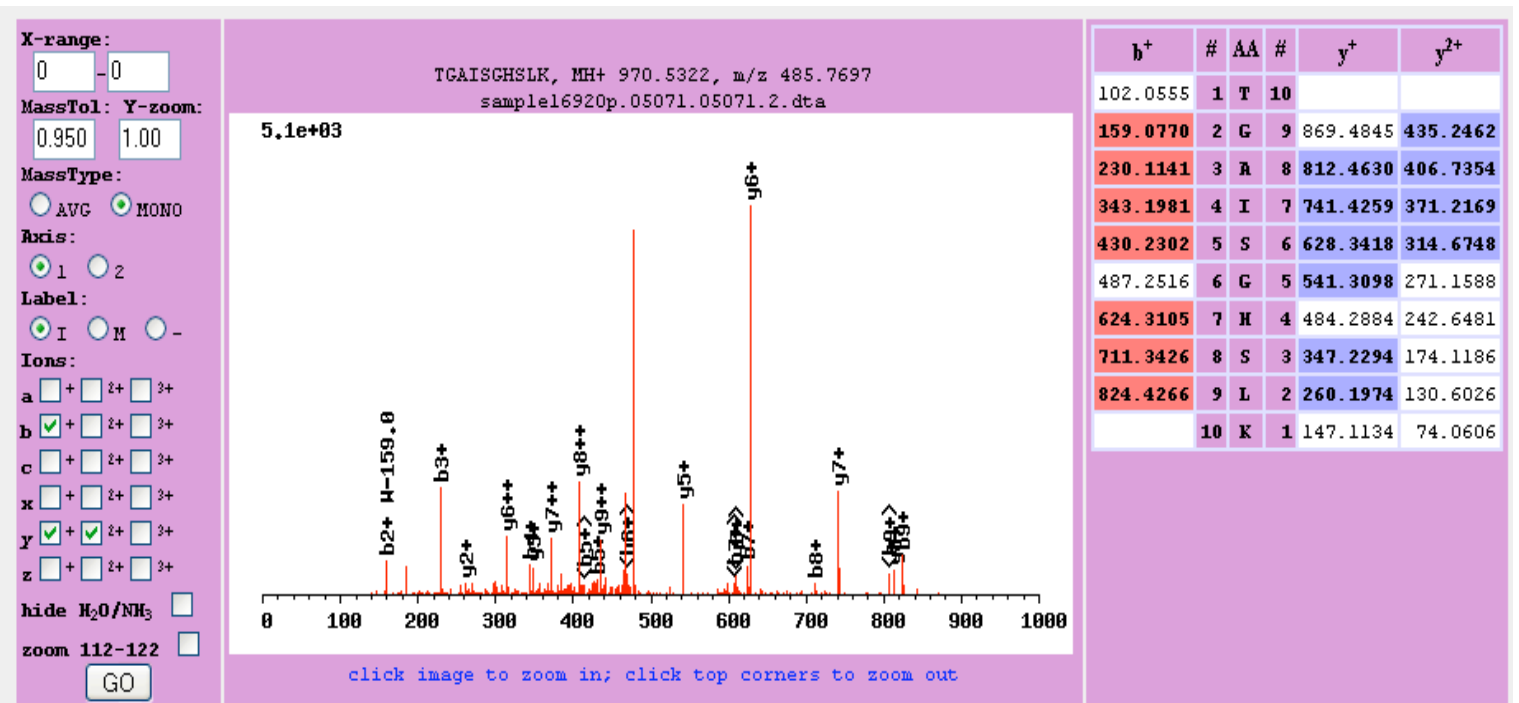

Protein: Plasma kallikrein precursor, Peptide: TGAISGHSLK, MH+ 970.5322, m/z 485.7697, sample16920p.05071.05071.2.dta

X-range: 0 - 0  
 MassTol: Y-zoom: 0.950 1.00  
 MassType:  AVG  MONO  
 Axis:  1  2  
 Label:  I  M  -  
 Ions: a  +  2+  3+  
 b  +  2+  3+  
 c  +  2+  3+  
 x  +  2+  3+  
 y  +  2+  3+  
 z  +  2+  3+  
 hide H<sub>2</sub>O/NH<sub>3</sub>   
 zoom 112-122   
 GO

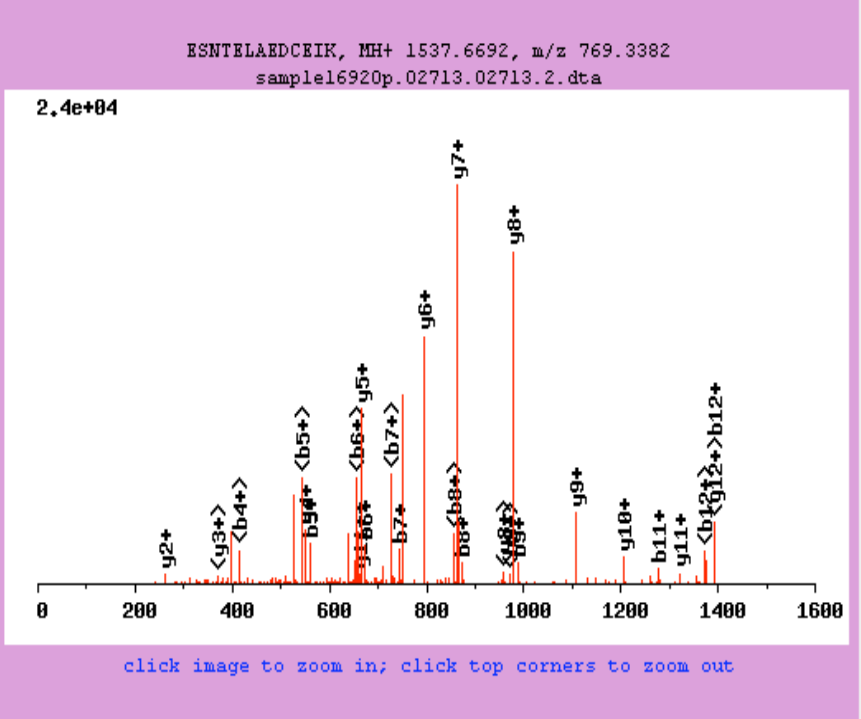

| b <sup>+</sup> | #  | AA | #  | y <sup>+</sup> | y <sup>2+</sup> |
|----------------|----|----|----|----------------|-----------------|
| 130.0504       | 1  | E  | 13 |                |                 |
| 217.0824       | 2  | S  | 12 | 1408.6266      | 704.8172        |
| 331.1254       | 3  | N  | 11 | 1321.5946      | 661.3012        |
| 432.1731       | 4  | T  | 10 | 1207.5516      | 604.2797        |
| 561.2156       | 5  | E  | 9  | 1106.5040      | 553.7559        |
| 674.2997       | 6  | L  | 8  | 977.4614       | 489.2346        |
| 745.3368       | 7  | R  | 7  | 864.3773       | 432.6926        |
| 874.3794       | 8  | E  | 6  | 793.3402       | 397.1740        |
| 989.4064       | 9  | D  | 5  | 664.2976       | 332.6527        |
| 1149.4370      | 10 | C  | 4  | 549.2707       | 275.1392        |
| 1278.4796      | 11 | E  | 3  | 389.2400       | 195.1239        |
| 1391.5637      | 12 | I  | 2  | 260.1974       | 130.6026        |
|                | 13 | K  | 1  | 147.1134       | 74.0606         |

C(10):+160.03

Protein: HMW kininogen-I variant, Peptide: ESNTELAEDCEIK, MH+ 1537.6692, m/z 769.3382, sample16920p.02713.02713.2.dta

X-range: 0 - 0  
 MassTol: Y-zoom: 0.950 1.00  
 MassType:  AVG  MONO  
 Axis:  1  2  
 Label:  I  M  -  
 Ions: a  +  2+  3+  
 b  +  2+  3+  
 c  +  2+  3+  
 x  +  2+  3+  
 y  +  2+  3+  
 z  +  2+  3+  
 hide H<sub>2</sub>O/NH<sub>3</sub>   
 zoom 112-122   
 GO

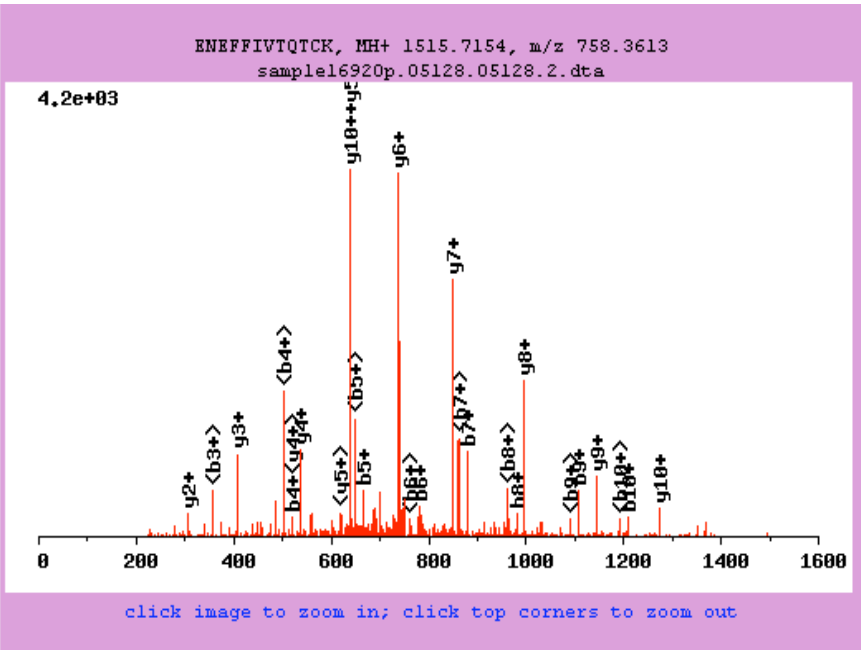

| b <sup>+</sup> | #  | AA | #  | y <sup>+</sup> | y <sup>2+</sup> |
|----------------|----|----|----|----------------|-----------------|
| 130.0504       | 1  | E  | 12 |                |                 |
| 244.0933       | 2  | N  | 11 | 1386.6728      | 693.8403        |
| 373.1359       | 3  | E  | 10 | 1272.6298      | 636.8188        |
| 520.2044       | 4  | F  | 9  | 1143.5872      | 572.2975        |
| 667.2728       | 5  | F  | 8  | 996.5188       | 498.7633        |
| 780.3568       | 6  | I  | 7  | 849.4504       | 425.2291        |
| 879.4252       | 7  | V  | 6  | 736.3663       | 368.6871        |
| 980.4729       | 8  | T  | 5  | 637.2979       | 319.1529        |
| 1108.5315      | 9  | Q  | 4  | 536.2503       | 268.6290        |
| 1209.5792      | 10 | T  | 3  | 408.1917       | 204.5998        |
| 1369.6098      | 11 | C  | 2  | 307.1440       | 154.0759        |
|                | 12 | K  | 1  | 147.1134       | 74.0606         |

C(11):+160.03

Protein: HMW kininogen-I variant, Peptide: ENEFFIVTQCK, MH+ 1515.7154, m/z 758.3613, sample16920p.05128.05128.2.dta

X-range: 0 - 0  
 MassTol: Y-zoom: 0.950 1.00  
 MassType:  AVG  MONO  
 Axis:  1  2  
 Label:  I  M  -  
 Ions: a  +  2+  3+  
 b  +  2+  3+  
 c  +  2+  3+  
 x  +  2+  3+  
 y  +  2+  3+  
 z  +  2+  3+  
 hide H<sub>2</sub>O/NH<sub>3</sub>   
 zoom 112-122   
 GO

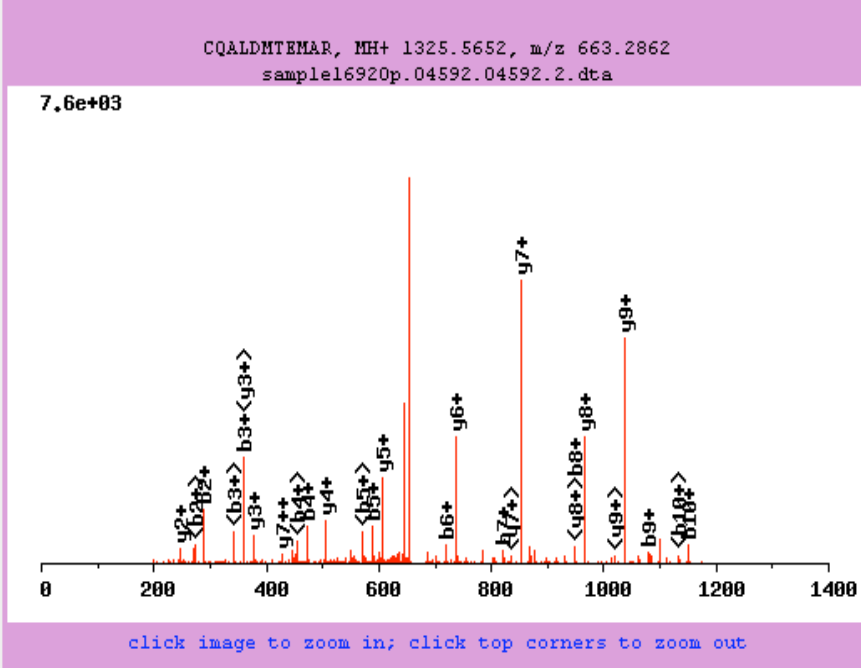

| b <sup>+</sup> | #  | AA | #  | y <sup>+</sup> | y <sup>2+</sup> |
|----------------|----|----|----|----------------|-----------------|
| 161.0385       | 1  | C  | 11 |                |                 |
| 289.0971       | 2  | Q  | 10 | 1165.5346      | 583.2712        |
| 360.1342       | 3  | R  | 9  | 1037.4760      | 519.2415        |
| 473.2182       | 4  | L  | 8  | 966.4389       | 483.7233        |
| 588.2452       | 5  | D  | 7  | 853.3548       | 427.1813        |
| 719.2857       | 6  | M  | 6  | 738.3279       | 369.6678        |
| 820.3333       | 7  | T  | 5  | 607.2874       | 304.1476        |
| 949.3759       | 8  | E  | 4  | 506.2397       | 253.6238        |
| 1080.4164      | 9  | M  | 3  | 377.1971       | 189.1025        |
| 1151.4535      | 10 | R  | 2  | 246.1566       | 123.5823        |
|                | 11 | R  | 1  | 175.1195       | 88.0637         |

C(1):+160.03

Protein: HMW kininogen-I variant, Peptide: CQALDMTEMAR, MH+ 1325.5652, m/z 663.2862, sample16920p.04592.04592.2.dta

X-range: 0 - 0  
 MassTol: Y-zoom: 0.950 1.00  
 MassType:  AVG  MONO  
 Axis:  1  2  
 Label:  I  M  -  
 Ions: a  +  2+  3+  
 b  +  2+  3+  
 c  +  2+  3+  
 x  +  2+  3+  
 y  +  2+  3+  
 z  +  2+  3+  
 hide H<sub>2</sub>O/NH<sub>3</sub>   
 zoom 112-122   
 GO

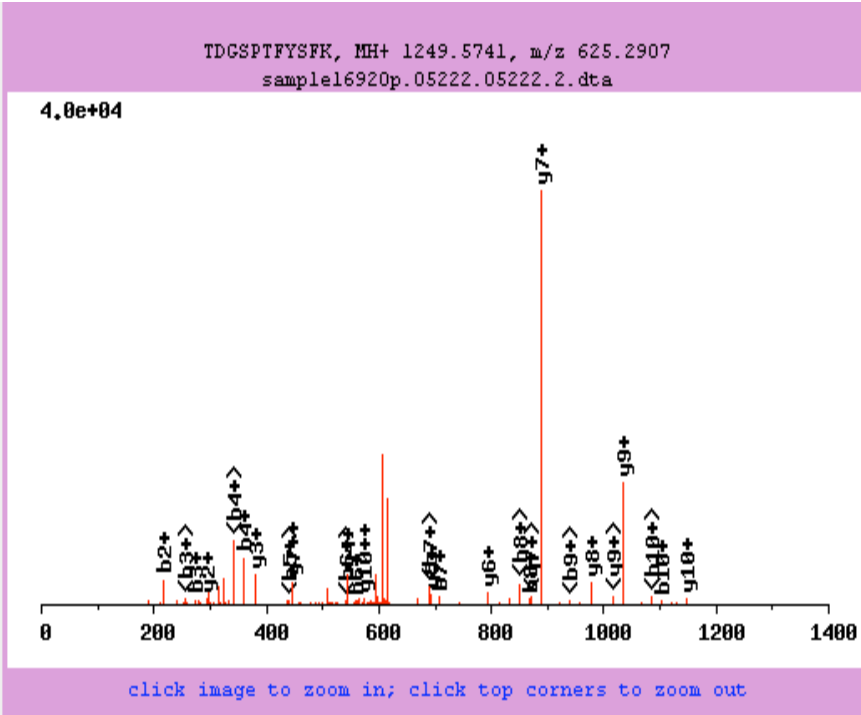

| b <sup>+</sup> | #  | AA | #  | y <sup>+</sup> | y <sup>2+</sup> |
|----------------|----|----|----|----------------|-----------------|
| 102.0555       | 1  | T  | 11 |                |                 |
| 217.0824       | 2  | D  | 10 | 1148.5264      | 574.7671        |
| 274.1039       | 3  | G  | 9  | 1033.4995      | 517.2536        |
| 361.1359       | 4  | S  | 8  | 976.4780       | 488.7423        |
| 458.1887       | 5  | P  | 7  | 889.4460       | 445.2263        |
| 559.2364       | 6  | T  | 6  | 792.3932       | 396.7001        |
| 706.3048       | 7  | F  | 5  | 691.3455       | 346.1767        |
| 869.3681       | 8  | Y  | 4  | 544.2771       | 272.6421        |
| 956.4001       | 9  | S  | 3  | 381.2138       | 191.1108        |
| 1103.4686      | 10 | F  | 2  | 294.1818       | 147.5948        |
|                | 11 | K  | 1  | 147.1134       | 74.0606         |

Protein: HMW kininogen-I variant, Peptide: TDGSPTFYSEK, MH+ 1249.5741, m/z 625.2907, sample16920p.05222.05222.2.dta

X-range: 0 - 0  
 MassTol: Y-zoom: 0.950 1.00  
 MassType:  AVG  MONO  
 Axis:  1  2  
 Label:  I  M  -  
 Ions: a  +  2+  3+  
 b  +  2+  3+  
 c  +  2+  3+  
 x  +  2+  3+  
 y  +  2+  3+  
 z  +  2+  3+  
 hide H<sub>2</sub>O/NH<sub>3</sub>   
 zoom 112-122   
 GO

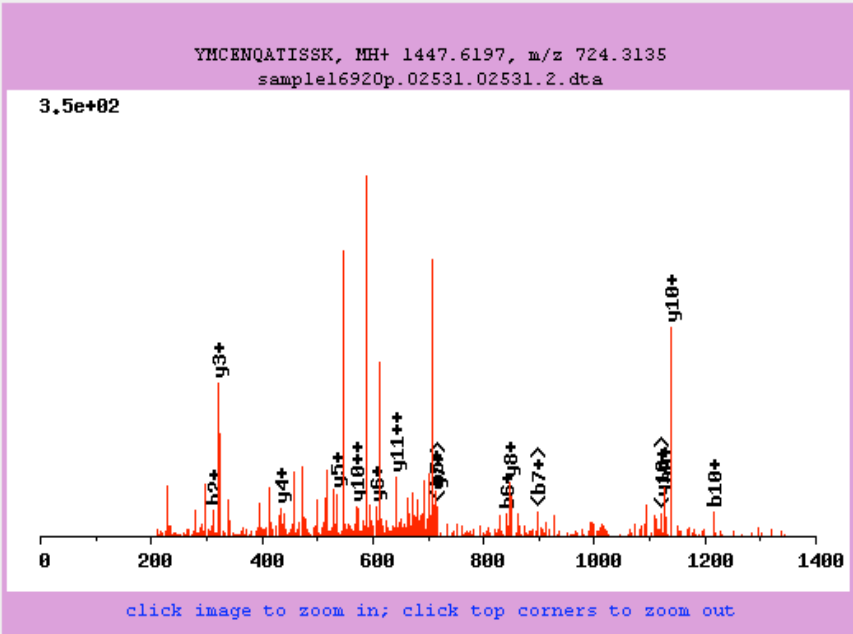

| b <sup>+</sup> | #  | AA | #  | y <sup>+</sup> | y <sup>2+</sup> |
|----------------|----|----|----|----------------|-----------------|
| 164.0712       | 1  | Y  | 12 |                |                 |
| 311.1066       | 2  | M  | 11 | 1284.5564      | 642.7821        |
| 471.1372       | 3  | C  | 10 | 1137.5210      | 569.2644        |
| 600.1798       | 4  | E  | 9  | 977.4904       | 489.2491        |
| 714.2227       | 5  | N  | 8  | 848.4478       | 424.7278        |
| 842.2813       | 6  | Q  | 7  | 734.4048       | 367.7063        |
| 913.3184       | 7  | R  | 6  | 606.3463       | 303.6770        |
| 1014.3661      | 8  | T  | 5  | 535.3092       | 268.1585        |
| 1127.4502      | 9  | I  | 4  | 434.2615       | 217.6346        |
| 1214.4822      | 10 | S  | 3  | 321.1774       | 161.0926        |
| 1301.5142      | 11 | S  | 2  | 234.1454       | 117.5766        |
|                | 12 | K  | 1  | 147.1134       | 74.0606         |

M(2):+147.04 C(3):+160.03

Protein: Serum albumin precursor,, Peptide: YMCENQATISSK,  
 MH+ 1447.6197, m/z 724.3135, sample16920p.02531.02531.2.dta

X-range: 0 - 0  
 MassTol: Y-zoom: 0.950 1.00  
 MassType:  AVG  MONO  
 Axis:  1  2  
 Label:  I  M  -  
 Ions: a  +  2+  3+  
 b  +  2+  3+  
 c  +  2+  3+  
 x  +  2+  3+  
 y  +  2+  3+  
 z  +  2+  3+  
 hide H<sub>2</sub>O/NH<sub>3</sub>   
 zoom 112-122   
 GO

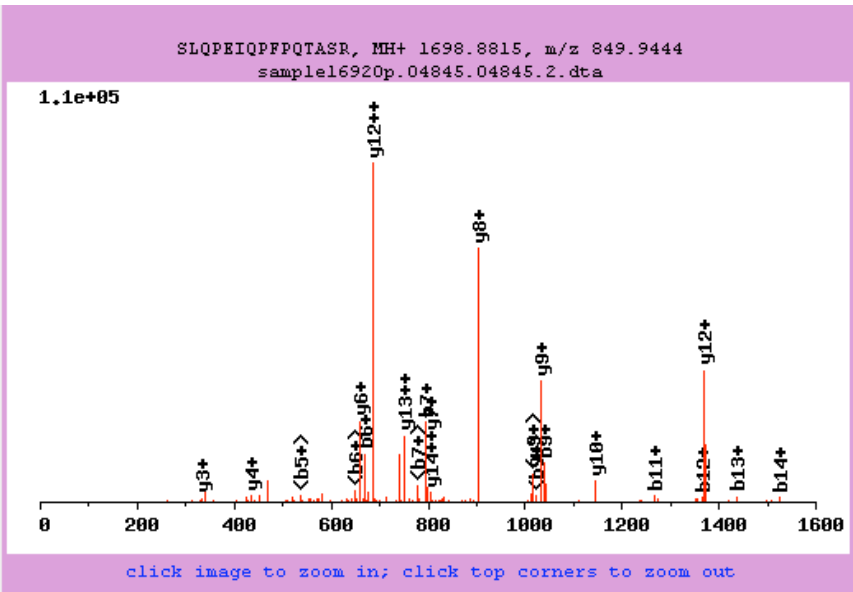

| b <sup>+</sup> | #  | AA | #  | y <sup>+</sup> | y <sup>2+</sup> |
|----------------|----|----|----|----------------|-----------------|
| 88.0399        | 1  | S  | 15 |                |                 |
| 201.1239       | 2  | L  | 14 | 1611.8495      | 806.4287        |
| 329.1825       | 3  | Q  | 13 | 1498.7654      | 749.8866        |
| 426.2353       | 4  | P  | 12 | 1370.7068      | 685.8573        |
| 555.2779       | 5  | E  | 11 | 1273.6541      | 637.3309        |
| 668.3619       | 6  | I  | 10 | 1144.6115      | 572.8097        |
| 796.4205       | 7  | Q  | 9  | 1031.5274      | 516.2676        |
| 893.4733       | 8  | P  | 8  | 903.4688       | 452.2383        |
| 1040.5417      | 9  | F  | 7  | 806.4161       | 403.7119        |
| 1137.5944      | 10 | P  | 6  | 659.3477       | 330.1777        |
| 1265.6530      | 11 | Q  | 5  | 562.2949       | 281.6514        |
| 1366.7007      | 12 | T  | 4  | 434.2363       | 217.6221        |
| 1437.7378      | 13 | R  | 3  | 333.1886       | 167.0982        |
| 1524.7698      | 14 | S  | 2  | 262.1515       | 131.5797        |
|                | 15 | R  | 1  | 175.1195       | 88.0637         |

Protein: Histidine-rich glycoprotein HRG,, Peptide: SLQPEIQPFQTASR,  
 MH+ 1698.8815, m/z 849.9444, sample16920p.04845.04845.2.dta
